SUMMER 2018 | VOLUME 30 | NUMBER 3

The Journal of  
**Neuropsychiatry**  
and Clinical Neurosciences

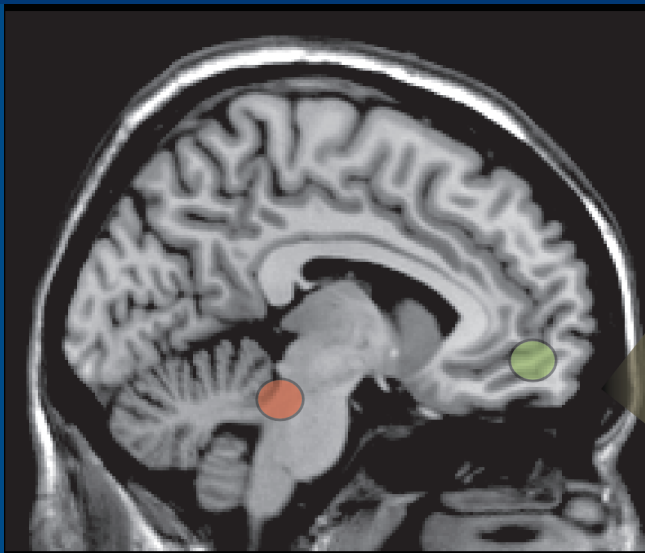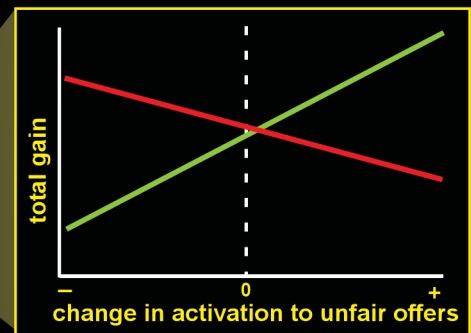

Interrelationships of Anger and PTSD:  
Contributions From Functional Neuroimaging

Noninvasive Brain Stimulation: Challenges and  
Opportunities for a New Clinical Specialty

Relationships Among Apathy, Health-Related Quality  
of Life, and Function in Huntington's Disease

Construction of a Potential Telephone Assessment  
of Dementia Prevalence and Severity

Mild Traumatic Brain Injury and Aggression, Impulsivity,  
and History of Other- and Self-Directed Aggression

Official Journal of the American Neuropsychiatric Association  
[neuro.psychiatryonline.org](http://neuro.psychiatryonline.org)
